# Supplementary material for: Field Studies Reveal Strong Postmating Isolation between Ecologically Divergent Butterfly Populations
Source: PubMed Central journal article supplement (PMC2964332; doi:10.1371/journal.pbio.1000529), 2010-10-26

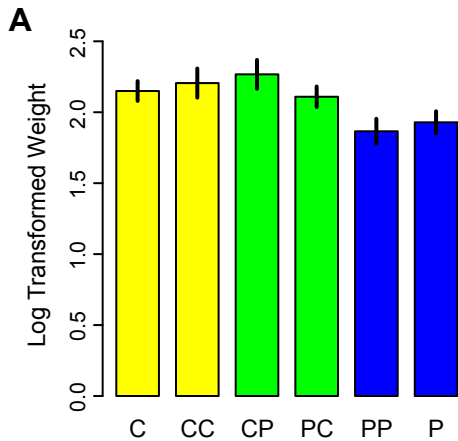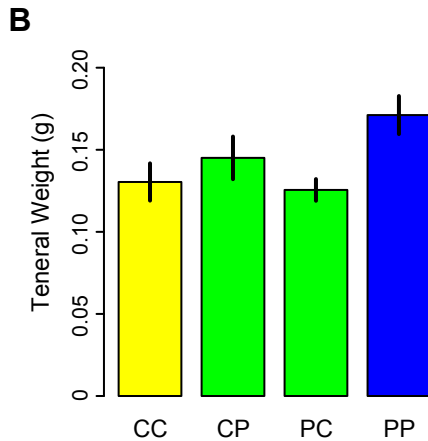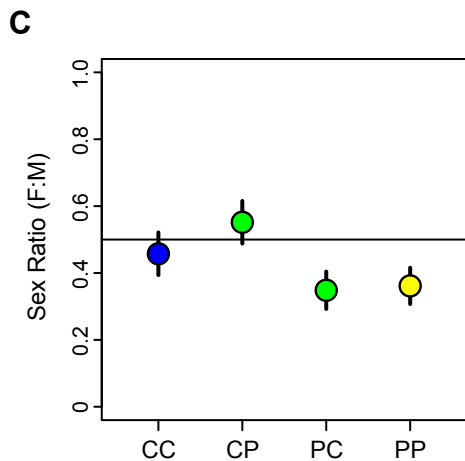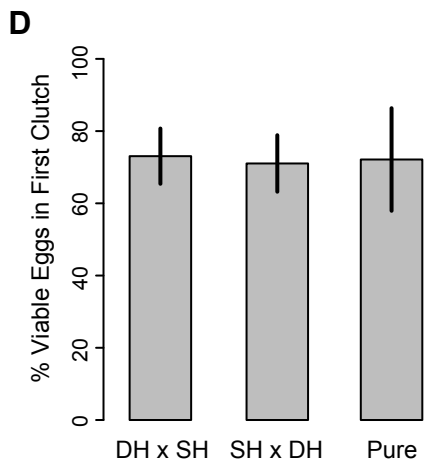

Supplement: pbio.1000529.s002.pdf [file pbio.1000529.s002.pdf]
