# Supplementary material for: Field Studies Reveal Strong Postmating Isolation between Ecologically Divergent Butterfly Populations
Source: PubMed Central journal article supplement (PMC2964332; doi:10.1371/journal.pbio.1000529), 2010-10-26
Supplement: pbio.1000529.s006.pdf [file pbio.1000529.s006.pdf]

**Table S2. ANOVA tables from analyses of early larval performance on *Psem*.** We monitored the growth and survival of sibling groups of 25-30 individuals that were left to hatch and feed for 10 days on naturally growing *Psem* plants in the field. In the experiment that included predators (A and B), each group of siblings had to be placed on a different plant to avoid mixing. Error variance therefore includes variation in plant quality (due to chemistry and/or microclimate). In the experiment that excluded predators (C and D), we were able to place one group of siblings from each of the three cross types all on a single plant. The Plant effect is therefore included in the model. The Cross Type effect examines overall variation among P, PP, and PC families. *P*-values for a priori contrasts between PC and PP families are found in the main text. See Figure S1B for visual presentation of data.

**A) Effects on log transformed weight in the presence of predators**

| Effect     | df | SS     | MS     | F      | <i>P</i> |
|------------|----|--------|--------|--------|----------|
| Cross Type | 2  | 0.4386 | 0.2193 | 1.9159 | 0.16     |
| Error      | 55 | 6.2949 | 0.1145 |        |          |

**B) Effects on arcsin transformed survival in the presence of predators**

| Effect     | df | SS     | MS     | F      | <i>P</i> |
|------------|----|--------|--------|--------|----------|
| Cross Type | 2  | 0.4908 | 0.2454 | 2.5798 | 0.08     |
| Error      | 72 | 6.8486 | 0.0951 |        |          |

**C) Effects on log transformed weight in the absence of predators**

| Effect       | df | SS     | MS     | F      | <i>P</i> |
|--------------|----|--------|--------|--------|----------|
| Site         | 13 | 5.8438 | 0.4495 | 8.0536 | < 0.0001 |
| Plant (Site) | 14 | 2.5841 | 0.1846 | 3.3069 | 0.0016   |
| Cross Type   | 2  | 1.0567 | 0.5284 | 9.4655 | 0.0004   |
| Error        | 39 | 2.1768 | 0.0558 |        |          |

**D) Effects on arcsin transformed survival in the absence of predators**

| Effect       | df | SS     | MS     | F      | <i>P</i> |
|--------------|----|--------|--------|--------|----------|
| Site         | 13 | 4.2012 | 0.3232 | 1.8402 | 0.06     |
| Plant (Site) | 14 | 3.2799 | 0.2343 | 1.334  | 0.2      |
| Cross Type   | 2  | 0.3201 | 0.1601 | 0.9113 | 0.4      |
| Error        | 50 | 8.7811 | 0.1756 |        |          |
