# Supplementary material for: Field Studies Reveal Strong Postmating Isolation between Ecologically Divergent Butterfly Populations
Source: PubMed Central journal article supplement (PMC2964332; doi:10.1371/journal.pbio.1000529), 2010-10-26
Supplement: pbio.1000529.s007.pdf [file pbio.1000529.s007.pdf]

**Table S3. ANOVA tables from analyses of larval performance on mature *Ctor*.** We monitored hybrid larvae placed on blooming to post-blooming *Ctor* plants for 10 days. We analyzed the effect of the larval type (CC vs. CP vs. PC vs. PP) on log transformed weight (A) and arcsin transformed survival (B). See Figure 3C for visual presentation of data.

**A) Effects on log transformed weight**

| Effect      | df | SS      | MS     | F       | <i>P</i> |
|-------------|----|---------|--------|---------|----------|
| Larval Type | 3  | 7.7878  | 2.5959 | 17.4406 | <0.0001  |
| Error       | 75 | 11.1633 | 0.1488 |         |          |

**B) Effects on arcsin transformed survival**

| Effect      | df | SS      | MS     | F      | <i>P</i> |
|-------------|----|---------|--------|--------|----------|
| Larval Type | 3  | 0.1927  | 0.0642 | 0.4192 | 0.7397   |
| Error       | 78 | 11.9508 | 0.1532 |        |          |
