# Supplementary material for: Field Studies Reveal Strong Postmating Isolation between Ecologically Divergent Butterfly Populations
Source: PubMed Central journal article supplement (PMC2964332; doi:10.1371/journal.pbio.1000529), 2010-10-26
Supplement: pbio.1000529.s009.pdf [file pbio.1000529.s009.pdf]

**Table S5. ANOVA tables from analyses of the effects of foraging height on *Psem*.**

We monitored pure P larvae placed on high and low leaves of naturally growing *Psem* plants in the field. We analyzed the effects of plant (replicate) and height (high vs. low) on weight (A) and survival (B). For the weight analysis, we only included plants with surviving (weighable) larvae on both leaves. See Figure 3E for visual presentation of weight data.

**A) Effects on log transformed weight**

| Effect | df | SS     | MS     | F       | <i>P</i> |
|--------|----|--------|--------|---------|----------|
| Plant  | 8  | 1.6157 | 0.202  | 3.0835  | 0.0659   |
| Height | 1  | 2.6923 | 2.6923 | 41.1049 | 0.0002   |
| Error  | 8  | 0.524  | 0.0655 |         |          |

**B) Effects on arcsin transformed survival**

| Effect | df | SS     | MS     | F      | <i>P</i> |
|--------|----|--------|--------|--------|----------|
| Plant  | 15 | 5.9124 | 0.3942 | 5.7941 | 0.0008   |
| Height | 1  | 0.0445 | 0.0445 | 0.6543 | 0.4312   |
| Error  | 15 | 1.0204 | 0.068  |        |          |
