# Supplementary material for: Field Studies Reveal Strong Postmating Isolation between Ecologically Divergent Butterfly Populations
Source: PubMed Central journal article supplement (PMC2964332; doi:10.1371/journal.pbio.1000529), 2010-10-26
Supplement: pbio.1000529.s011.pdf [file pbio.1000529.s011.pdf]

**Table S7. ANOVA tables from analyses of the effects of female clutch size on offspring growth (A) and survival (B) on *Psem*.** We monitored the growth and survival of groups of 5, 10, 20, and 40 neonate larvae placed on *Psem* plants in the field for 10 days. The Clutch Size effect examines variation among the different sized groups. See Figure 5B for visual presentation of data.

**A) Effects on log transformed weight**

| Effect      | df | SS     | MS     | F      | <i>P</i> |
|-------------|----|--------|--------|--------|----------|
| Site        | 14 | 8.0051 | 0.5718 | 4.3388 | 0.0026   |
| Clutch Size | 3  | 0.4514 | 0.1505 | 1.1418 | 0.3606   |
| Error       | 17 | 2.2404 | 0.1318 |        |          |

**B) Effects on untransformed survival**

| Effect      | df | SS     | MS     | F      | <i>P</i> |
|-------------|----|--------|--------|--------|----------|
| Site        | 14 | 2.1167 | 0.1512 | 4.2165 | < 0.0001 |
| Clutch Size | 3  | 0.4227 | 0.1409 | 3.9295 | 0.0133   |
| Error       | 52 | 1.8646 | 0.0359 |        |          |
