# Supplementary material for: Field Studies Reveal Strong Postmating Isolation between Ecologically Divergent Butterfly Populations
Source: PubMed Central journal article supplement (PMC2964332; doi:10.1371/journal.pbio.1000529), 2010-10-26
Supplement: pbio.1000529.s012.pdf [file pbio.1000529.s012.pdf]

**Table S8. ANOVA tables from analyses of the effects of oviposition site height on offspring development time on *Psem*.** We monitored pure P eggs laid on high and low leaves of naturally growing *Psem* plants in the field. We analyzed the effects of plant (replicate) and height (high vs. low) on development time (time to hatching). See Figure 5C for visual presentation of development time data.

| Effect | df | SS       | MS       | F        | <i>P</i> |
|--------|----|----------|----------|----------|----------|
| Plant  | 16 | 115.5294 | 7.2206   | 5.9157   | 0.0005   |
| Height | 1  | 192.9706 | 192.9706 | 158.0964 | < 0.0001 |
| Error  | 33 | 328.0294 | 1.2206   |          |          |
