# Supplementary material for: Field Studies Reveal Strong Postmating Isolation between Ecologically Divergent Butterfly Populations
Source: PLoS Biol. 2010 Oct 26;8(10):e1000529. doi: 10.1371/journal.pbio.1000529 (PMC2964332; doi:10.1371/journal.pbio.1000529)
Supplement: Table S1 — ANOVA tables from analyses of early larval performance on Ctor . (0.08 MB PDF) [file pbio.1000529.s005.pdf]

**Table S1. ANOVA tables from analyses of early larval performance on *Ctor*.** We monitored the growth and survival of sibling groups of 4-6 individuals that were left to hatch and feed for 10 days on naturally growing *Ctor* plants in the field. The Cross Type effect encompasses overall variation among C, CC, and CP families. See Figure S1A for visual presentation of data.

**A) Effects on log transformed weight**

| Effect     | df | SS     | MS     | F      | <i>P</i> |
|------------|----|--------|--------|--------|----------|
| Cross Type | 2  | 0.0707 | 0.0353 | 0.4512 | 0.6      |
| Error      | 25 | 1.9588 | 0.0784 |        |          |

**B) Effects on arcsin transformed survival**

| Effect     | df | SS     | MS     | F      | <i>P</i> |
|------------|----|--------|--------|--------|----------|
| Cross Type | 2  | 0.4062 | 0.2031 | 1.5589 | 0.2      |
| Error      | 25 | 3.2566 | 0.1303 |        |          |
